# Supplementary material for: Point Mutations in the 14-α Sterol Demethylase Cyp51A or Cyp51C Could Contribute to Azole Resistance in Aspergillus flavus
Source: MDPI journal article supplement (doi:10.3390/genes11101217), 2020-10-17
Supplement: s1 [file s1]

**Supplementary Table 1.** Clinical *Aspergillus flavus* isolates: sample origin and year of isolation. In red the *A. flavus* azole resistant strains.

| Strains | Sample origin            | Year Isolation |
|---------|--------------------------|----------------|
| CM7668  | Sputum                   | 2015           |
| CM8087  | Cutaneous Biopsy         | 2016           |
| CM9165  | Bronchial aspirate       | 2018           |
| CM9174  | Bronchoalveolar lavage   | 2018           |
| CM9189  | Bronchial aspirate       | 2018           |
| CM9195  | Synovial Liquid          | 2018           |
| CM9228  | Sputum                   | 2018           |
| CM9267  | Muscle Biopsy            | 2018           |
| CM9298  | Nasal Biopsy             | 2018           |
| CM9326  | Bronchoalveolar lavage   | 2018           |
| CM9329  | Cerebral Abscess         | 2018           |
| CM9331  | Bronchoalveolar lavage   | 2018           |
| CM9684  | Mastoid debridement      | 2019           |
| TP642   | Sputum (cystic fibrosis) | 2017           |
| TP968   | Sputum (cystic fibrosis) | 2018           |
| TP992   | Surgical wound           | 2018           |
| TP1004  | Sputum (cystic fibrosis) | 2018           |
| TP1115  | Sputum (cystic fibrosis) | 2018           |
| TP1179  | Sputum (cystic fibrosis) | 2018           |

**Supplementary Table 2.** Primers used for *Aspergillus flavus* *cyp51A*, *cyp51B* and *cyp51C* DNA amplification and sequencing and RT-PCR from RNA.

| Primer use                      | Primer name    | Primer sequence (5'-3')  | Reference |
|---------------------------------|----------------|--------------------------|-----------|
| <i>cyp51A</i> gene and promoter | Afla_Cyp51A_F1 | CAAGAACAGCCTGCACAGAG     | [25]      |
|                                 | Afla_Cyp51A_R1 | GGGTGGATCAGTCTTATTA      |           |
|                                 | Afla_Cyp51A_F2 | GCAATCATCGTCCTAAATC      |           |
|                                 | Afla_Cyp51A_R2 | CTGTCCATTCTTGTAGGTA      |           |
|                                 | Afla_Cyp51A_F3 | GCATGAGGGAGATCTATATG     |           |
|                                 | Afla_Cyp51A_R3 | CCTATAATTGCTGGTTTCG      |           |
|                                 | Afla_Cyp51A_F4 | TGAAGCTATTCAATGTAGAC     |           |
|                                 | Afla_Cyp51A_R4 | ACTGCTGATGGTGTGCTAAG     |           |
| RT_PCR                          | Cyp51A_RT_F    | TAAATCTGTTGCGCCAGCTC     | This work |
|                                 | Cyp51A_RT_R    | ATCTCCTCGGCATTGACATC     |           |
| Primer use                      | Primer name    | Primer sequence (5'-3')  |           |
| <i>cyp51B</i> gene and promoter | Afla_Cyp51B_F1 | ATGGGCATCCTAGCTGTCATTC   | This work |
|                                 | Afla_Cyp51B_R1 | GGCGGTGTATATGGTAATCTC    |           |
|                                 | Afla_Cyp51B_F2 | CCCTTGGTATTTTCATTGGTTCCC |           |
|                                 | Afla_Cyp51B_R2 | TTTCATGTTACCATGGGCCC     |           |
|                                 | Afla_Cyp51B_F3 | TTTCATGTTACCATGGGCCC     |           |
|                                 | Afla_Cyp51B_R3 | TTCAGAGCTAACAGCGATGGC    |           |
|                                 | Afla_Cyp51B_F4 | CGGAAGAACATTTCCCTGATCC   |           |
|                                 | Afla_Cyp51B_R4 | CGTCTGGCAATATCATGCAC     |           |
| RT_PCR                          | Cyp51B_RT_F    | CGGAAGTACCATCAGCTATG     | This work |
|                                 | Cyp51B_RT_R    | ACACAGGAGTTGTAAGTGGG     |           |
| Primer use                      | Primer name    | Primer sequence (5'-3')  |           |
| <i>cyp51C</i> gene and promoter | CypC_Af1_F     | CAATGGTGCTGACAAACCTG     | [25]      |
|                                 | CypC_Af2_R     | CAAAGGAGCGACACATAAG      |           |
|                                 | AflaCYP51CF2   | GGTAATGTCTGGTCATAGG      |           |
|                                 | AflaCYP51CR2   | ATGAGCTTGGAATTGGG        |           |
|                                 | AflaCYP51CF3   | CGAATTCATCCTCAATGG       |           |
|                                 | AflaCYP51CR3   | GTCTCTCGGATCACATT        |           |
|                                 | AflaCYP51CF4   | GGAACTCTACCAAGAGCA       |           |
|                                 | CypC_Af8_R     | GCTCATCATAATGCATGAGG     |           |
| RT_PCR                          | Cyp51C_RT_F    | CGCATGCTGAACAAGACTAG     | This work |
|                                 | Cyp51C_RT_R    | TCCGCGTTCACGTCTTTCAG     |           |

**Supplementary Table 3. GenBank Accession Numbers of all *A. flavus* *cyp51A*, *cyp51B* and *cyp51C*.**

| Strain      | <i>cyp51s</i> | GenBank Acc. Ns |
|-------------|---------------|-----------------|
| CM7668      | <i>cyp51A</i> | MT849811        |
| CM8087      | <i>cyp51A</i> | MT849810        |
| CM8098      | <i>cyp51A</i> | MT849809        |
| CM9165      | <i>cyp51A</i> | MT849808        |
| CM9174      | <i>cyp51A</i> | MT849807        |
| CM9189      | <i>cyp51A</i> | MT849806        |
| CM9195      | <i>cyp51A</i> | MT849805        |
| CM9228      | <i>cyp51A</i> | MT849804        |
| CM9267      | <i>cyp51A</i> | MT849803        |
| CM9298      | <i>cyp51A</i> | MT849802        |
| CM9326      | <i>cyp51A</i> | MT849801        |
| CM9329      | <i>cyp51A</i> | MT849800        |
| CM9331      | <i>cyp51A</i> | MT849799        |
| CM9684      | <i>cyp51A</i> | MT849798        |
| TPH642      | <i>cyp51A</i> | MT849797        |
| TPH968      | <i>cyp51A</i> | MT849796        |
| TPH992      | <i>cyp51A</i> | MT849795        |
| TPH1004     | <i>cyp51A</i> | MT849794        |
| TPH1115     | <i>cyp51A</i> | MT849793        |
| TPH1179     | <i>cyp51A</i> | MT849793        |
| ATCC2004304 | <i>cyp51A</i> | MT849812        |
| CM7668      | <i>cyp51B</i> | MT849771        |
| CM8087      | <i>cyp51B</i> | MT849772        |
| CM8098      | <i>cyp51B</i> | MT849773        |
| CM9165      | <i>cyp51B</i> | MT849774        |
| CM9174      | <i>cyp51B</i> | MT849775        |

|             |               |          |
|-------------|---------------|----------|
| CM9189      | <i>cyp51B</i> | MT849776 |
| CM9195      | <i>cyp51B</i> | MT849777 |
| CM9228      | <i>cyp51B</i> | MT849778 |
| CM9267      | <i>cyp51B</i> | MT849779 |
| CM9298      | <i>cyp51B</i> | MT849780 |
| CM9326      | <i>cyp51B</i> | MT849781 |
| CM9329      | <i>cyp51B</i> | MT849782 |
| CM9331      | <i>cyp51B</i> | MT849783 |
| CM9684      | <i>cyp51B</i> | MT849784 |
| TPH642      | <i>cyp51B</i> | MT849785 |
| TPH968      | <i>cyp51B</i> | MT849786 |
| TPH992      | <i>cyp51B</i> | MT849787 |
| TPH1004     | <i>cyp51B</i> | MT849788 |
| TPH1115     | <i>cyp51B</i> | MT849789 |
| TPH1179     | <i>cyp51B</i> | MT849790 |
| ATCC2004304 | <i>cyp51B</i> | MT849791 |
| CM7668      | <i>cyp51C</i> | MT853225 |
| CM8087      | <i>cyp51C</i> | MT853226 |
| CM8098      | <i>cyp51C</i> | MT853227 |
| CM9165      | <i>cyp51C</i> | MT853228 |
| CM9174      | <i>cyp51C</i> | MT853229 |
| CM9189      | <i>cyp51C</i> | MT853230 |
| CM9195      | <i>cyp51C</i> | MT853231 |
| CM9228      | <i>cyp51C</i> | MT853232 |
| CM9267      | <i>cyp51C</i> | MT853233 |
| CM9298      | <i>cyp51C</i> | MT853234 |
| CM9326      | <i>cyp51C</i> | MT853235 |
| CM9329      | <i>cyp51C</i> | MT853236 |
| CM9331      | <i>cyp51C</i> | MT853237 |
| CM9684      | <i>cyp51C</i> | MT853238 |

|             |               |          |
|-------------|---------------|----------|
| TPH642      | <i>cyp51C</i> | MT853239 |
| TPH968      | <i>cyp51C</i> | MT853240 |
| TPH992      | <i>cyp51C</i> | MT853241 |
| TPH1004     | <i>cyp51C</i> | MT853242 |
| TPH1115     | <i>cyp51C</i> | MT853243 |
| TPH1179     | <i>cyp51C</i> | MT853244 |
| ATCC2004304 | <i>cyp51C</i> | MT853245 |
